# Supplementary material
Source: PubMed Central journal article supplement (PMC6112987)

Ext. data Fig. 1I

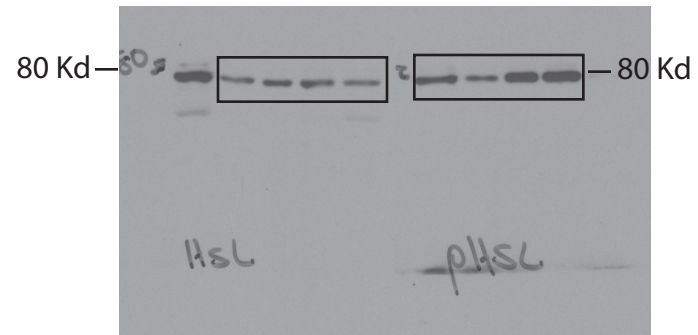

Supplement: NIHMS969738-supplement-1.pdf [file NIHMS969738-supplement-1.pdf]
